# Supplementary material for: Prevalence of Antibiotic-Resistant E. coli Strains in a Local Farm and Packing Facilities of Honeydew Melon in Hermosillo, Sonora, Mexico
Source: MDPI journal article supplement (doi:10.3390/antibiotics11121789), 2022-12-09
Supplement: s1 [file s1]

**Table S1.** Specific oligonucleotides used in this study

| <b>Gene</b>          | <b>Sequence (5' - 3')</b>                             | <b>Amplicon size</b> | <b>Reference</b> |
|----------------------|-------------------------------------------------------|----------------------|------------------|
| <i>ybbw</i>          | F:tgattggcaaaatctggccg<br>R:atactggcaatcagtagccg      | 670 pb               | [43,44]          |
| CTX-M1&8             | F:tgtgcagyaccagtaargykatg<br>R:tarrrtsaccagaayvagcggc | 583 pb               | [48]             |
| CTX-M2               | F:cgagtggcagtagcagtaagg<br>R:cgatatacgttggtggtgc      | 540 bp               | [48]             |
| CTX-M9               | F:atggtgacaaagagagtgcaa<br>R:aatatcattggtggtgccgtag   | 747 pb               | [48]             |
| CTX-M151             | F:gcgccatgataggtacg<br>R:aaagtaagtcacaataaccagcg      | 786 pb               | [48]             |
| TEM                  | F:caacattttcgtgtcgccc<br>R:gcttaatcagtgaggcacc        | 844 pb               | [48]             |
| SHV                  | F:tattatctccctgtagcca<br>R:cgctctgcttggtagtc          | 783 pb               | [48]             |
| <i>qepA</i>          | F:gaggtccagcagcgggtag<br>R: caactgctgagcccgtag        | 617 pb               | [49]             |
| <i>aac(6')-Ib-cr</i> | F: ttcgatgctctatgagtggtta<br>R:ctcgaatgcctggcgtgttt   | 482 pb               | [49]             |
